# Supplementary material for: Taxonomic profiling and populational patterns of bacterial bile salt hydrolase (BSH) genes based on worldwide human gut microbiome
Source: PubMed Central journal article supplement (PMC6345003; doi:10.1186/s40168-019-0628-3), 2019-01-23
Supplement: 40168_2019_628_MOESM1_ESM.pdf [file 40168_2019_628_MOESM1_ESM.pdf]

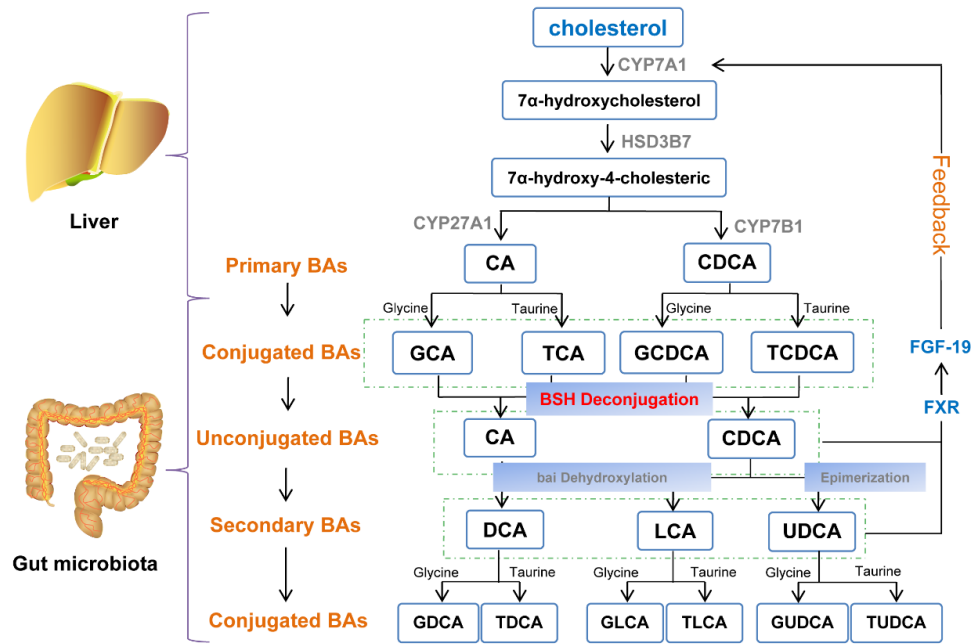

**Figure S1 The enterohepatic circulation of bile acids.** In the liver, cholesterol is converted to  $7\alpha$ -hydroxycholesterol by CYP7A1. The  $3\beta$ -hydroxysteroid dehydrogenase (HSD3B7) converts  $7\alpha$ -hydroxycholesterol to  $7\alpha$ -hydroxy-4-cholesteric, which eventually is converted to primary bile acids (BAs) by CYP7A1 and CYP27B1. The primary BAs (CA and CDCA) usually conjugated with the glycine or taurine to conjugated BAs (GCA, TCA, GCDCA and TCDCA), and transfer to intestine. BSH in gut microbiota would catalyze the hydrolysis of conjugated BAs into deconjugated BAs. Then, microbial bai dehydroxylase removes a hydroxyl group from C-7 and converts CA to DCA or CDCA to LCA and UDCA. These secondary BAs could active the feedback pathway to preserve the balance of metabolism of BAs by FXR. Meanwhile, the DCA, LCA and UDCA could conjugate with glycine and taurine to conjugated BAs (GDCA, TDCA, GLCA, TLCA, GUDCA and TUDCA). CA, Cholic acid; CDCA, Chenodeoxycholic acid; GCA, Glycocholic acid; TCA, Taurocholic acid; GCDCA, Glycochenodeoxycholic acid; TCDCA, Taurochnodeoxycholic acid; DCA, Deoxycholic acid; LCA, Lithocholic acid; UDCA, Ursodeoxycholic acid; GDCA, Glycine deoxycholic acid; TDCA, Taurodeoxycholic acid; GLDCA, Glycolithocholic acid; TLCA, Taurolithocholic acid; GUDCA, Glycoursodeoxycholic acid; TUDCA, tauroursodeoxycholic acid.

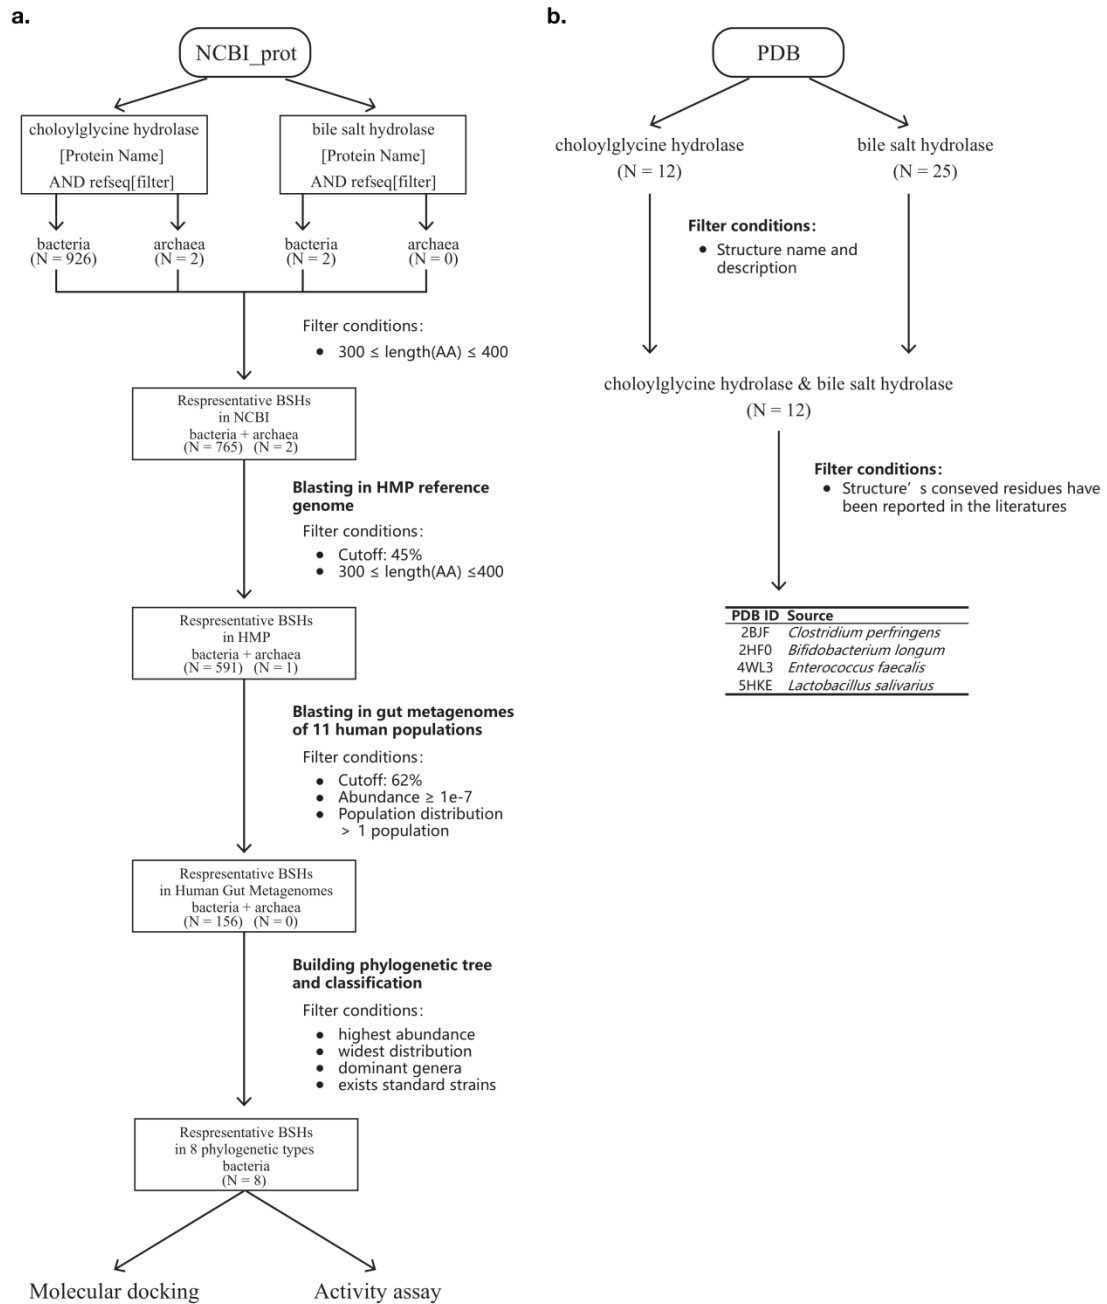

**Figure S2 The analysis flowcharts. a** The screening process of BSH sequence for taxonomic and activity identification. **b** The filter procedures of typical BSH structures.

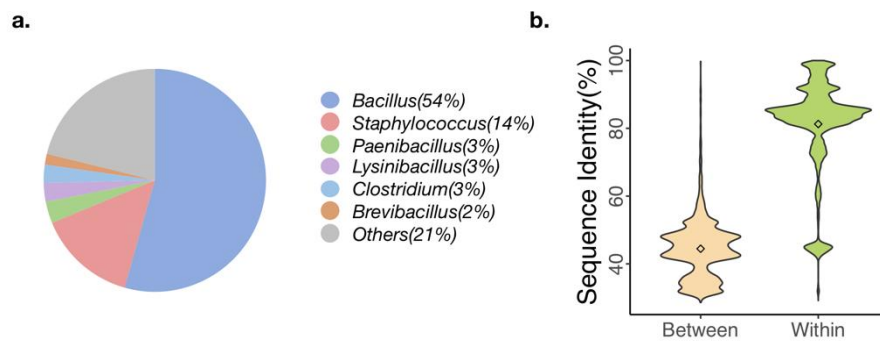

**Figure S3 Genera characterization of BSHs obtained from NCBI database. a** The proportion of 765 reported BSHs containing genus. **b** The identity of 765 reported BSHs between genus and within genus.

**a.** **The average sequence identity = 40.41%**

```

2BJF[Clostridium]      NCTGLALETKDGLHLFGRNNDI EYSFMSI I FI PRNFKVKNKSNKEIITTKYAVLGMETI FDDYFTFADGMEKELGCACLNFRPVVYSKEDI EGRTNI PWNFLLYVLANFSSVEEVK 120
2HF0[Bifidobacterium] CTGVRSSDDEGNTYFGRNLDVSFSYGETI LVTPRGCHYCTVFCAGGAKPAVAI GVGWNAARRNYFDCAHEGLAI AGLNFRPGYASFVHEPVECTEINATFEPLVVARINFDSVDEVE 119
4WL3[Enterococcus]   CTAI I YVSKD . HYFCRNFDYEI SYNEVVTI TPRNYKFSFR EVGNLDHRFAI I GI AAGI ADYPLYDCAI NEKCLGACLNFRSGYADY KKI EEEKENVSPEEFI FVLLGGCSTVDEAK 115
5HKE[Lactobacillus]  MCTAI TLNGNS . NYFCRNLDLDFSYGEEVI I TFAEYERKFR KEKA I KNHKSII GVI I ANDYPLYDCAI NEDCLGACLNFRGNAYSCALENDKDIH TPEEFI PWI LGGCSDVNEAR 117

2BJF[Clostridium]      EALKIAMI VDI PI SEN PATTLHWVI SDI TGKSI VVEGTEKELNVEDNNI EVLTNSETFDYHVANLINCYVGLRYNCVPEFKLGDGSLTALGGCTGLVGLPGDFTASRFI RVARLRICAM 240
2HF0[Bifidobacterium] ETLRNVTLVSCI VPCGC. ESLLHVRI GDCK RSI VVEGADGNVHVHDDVDVLTNCFDFDHVENLRNMYVCSNEMAEFI SVGKASLTAVGAGVGNHGI PGDVSPPSRFRVAVYINAHYP 237
4WL3[Enterococcus]   KLLKLNLLNVI NFSDELPLSPLHVLADKE CSI VVESTKEGLRVFDNPVCEVLTNFTFDYQLFNLNRYVLSRTFRPKINFSDCI ELDI YSRGMGGI GLPGDLSVSRFRVATFTKLNISV 234
5HKE[Lactobacillus]  NLVEKI NLI NLSFSEGLPLAGLHVLI ADRE KSI VVEVTKSGVHI YDNR I GI LTNNPEFNQYINLNKYRNL SI STFRQNTFSQSDVLKVDGTGFGGI GLPGDVSPESTRFRVATFTSKLNIS 236

2BJF[Clostridium]      KNDKDSI DLI EFFHI LNNI ANVRGSTRIVEEKSDLTQNTSQCMEKGI YYYKTYENNGI NAI DNKNENLDNEI HTYKYNKILSI IHHVI . 329
2HF0[Bifidobacterium] GNDEAANVSRFLFTLGSVQVWDBAKMGDCGFERTLFTSQYSSKTATYYMNTYDDFAI RSYANADYMDSSSELI SVAR . . . . . 316
4WL3[Enterococcus]   SRSSEYESI SCFFHI LSSVECCCKGLCDVGEKEYEYI YSSGCNLEKGI YYYRTYDNGI TAVDNKENLEKDSLI VYRMVETCC I IYANLE 325
5HKE[Lactobacillus]  KGNTEVEDI TGFHHI LSTVEGI KGVNKTESGKEEYIYNSNGYLDNNTLYTYTYEIRGI VAVTLNKD. KQGNRLVITYRFERKGI I I KLNLE 326

```

**b.**

| PDB ID | Sequence alignment, identity(%) |       |       |
|--------|---------------------------------|-------|-------|
|        | 2BJF                            | 2HF0  | 4WL3  |
| 2HF0   | 35.76                           |       |       |
| 4WL3   | 43.46                           | 36.74 |       |
| 5HKE   | 37.27                           | 34.91 | 54.29 |

**Figure S4 The sequence identity of reported BSH sequences. a** Multiple sequences alignment of reported BSHs. Grey backgrounds indicate an average identity  $\geq 50\%$  among three BSHs. **b** The pairwise sequence identity of four reported BSH sequences.

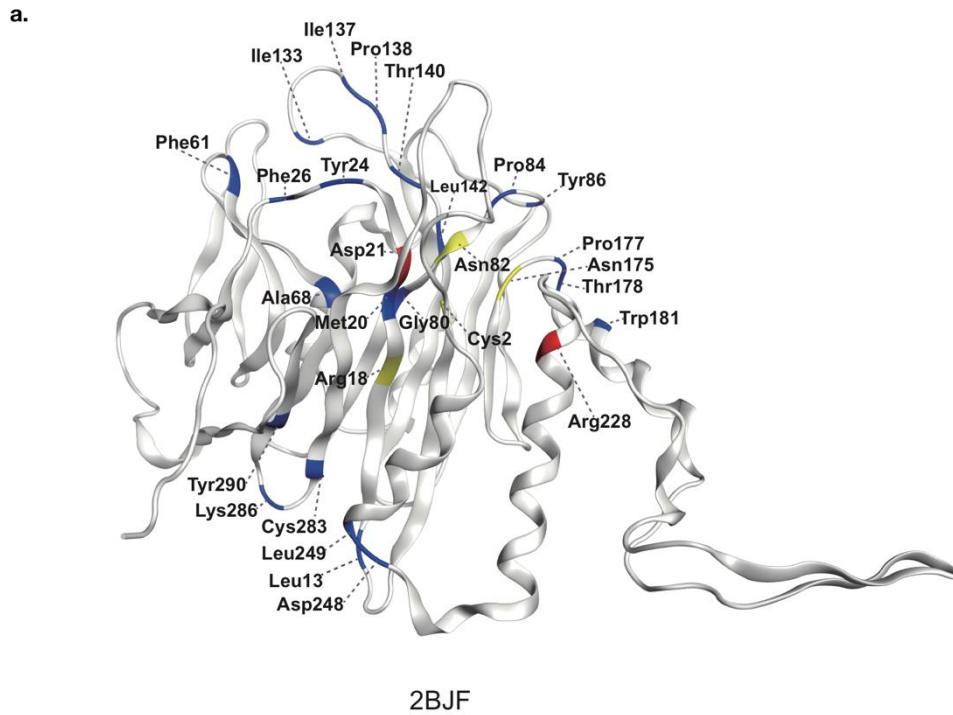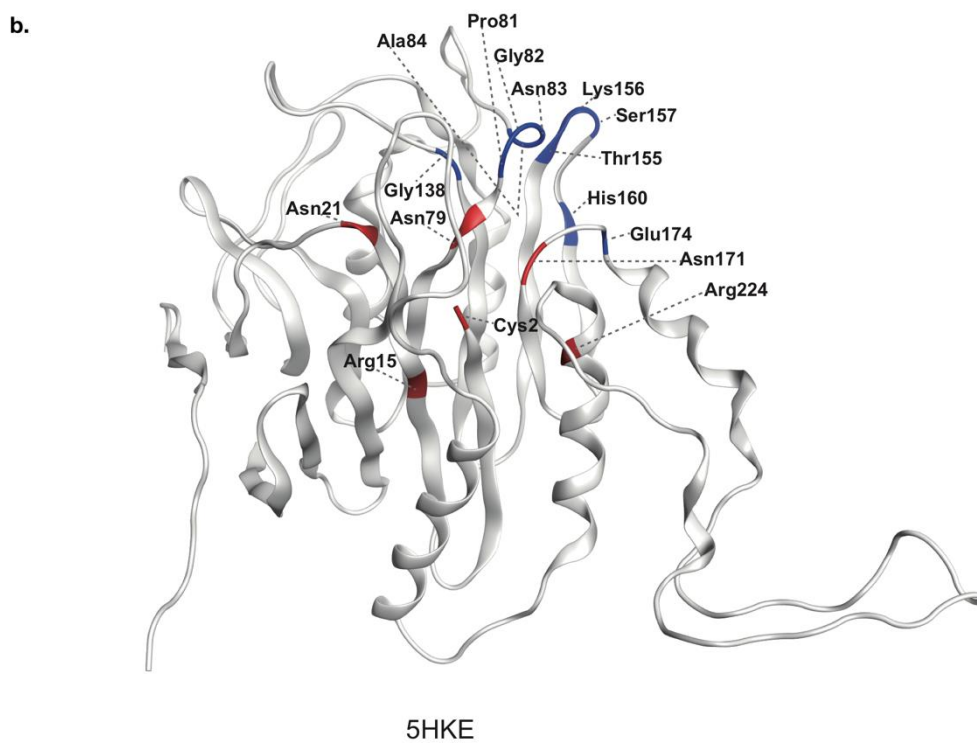

**Figure S5 Reported conserved residues of BSH in PDB database. a** 3D structure of CpBSH (PDB ID 2BJF) and LsBSH (PDB ID 5HKE) with their residues reported in the literature (red), in the PDBsum (blue) and both in the literature and PDBsum (yellow).

| Phylum         | Order               | Family                 | Genus                | No. |
|----------------|---------------------|------------------------|----------------------|-----|
| Actinobacteria | Bifidobacteriales   | Bifidobacteriaceae     | Bifidobacterium      | 17  |
|                | Corynebacteriales   | Gordoniaceae           | Gordonia             | 1   |
|                |                     | Mycobacteriaceae       | Mycobacterium        | 5   |
|                | Micrococcales       | Micrococcaceae         | Paenarthrobacter     | 1   |
|                | Nakamurellales      | Nakamurellaceae        | Nakamurella          | 1   |
|                | Pseudonocardiales   | Pseudonocardiaceae     | Saccharopolyspora    | 1   |
|                | Streptomycetales    | Streptomycetaceae      | Streptomyces         | 1   |
|                | Coriobacteriales    | Coriobacteriaceae      | Collinsella          | 1   |
|                | Eggerthellales      | Eggerthellaceae        | Slackia              | 1   |
|                |                     | Bacteroidaceae         | Bacteroides          | 78  |
| Bacteroidetes  | Bacteroidales       | Porphyromonadaceae     | Parabacteroides      | 10  |
|                |                     | Rikenellaceae          | Alistipes            | 1   |
|                | Cytophagales        | Cytophagaceae          | Cytophaga            | 1   |
|                |                     |                        | Microscilla          | 1   |
| Chlamydiae     | Flavobacteriales    | Flavobacteriaceae      | Chryseobacterium     | 1   |
|                | Sphingobacteriales  | Sphingobacteriaceae    | Flavobacterium       | 2   |
|                | Chlamydiales        | Waddliaceae            | Sphingobacterium     | 1   |
| Cyanobacteria  | Gloeobacteriales    |                        | Waddlia              | 1   |
|                |                     |                        | Gloeobacter          | 1   |
| Euryarchaeota  | Chroococcales       | Unassigned             | Cyanothece           | 1   |
|                |                     |                        | Synechococcus        | 2   |
|                | Methanobacteriales  | Methanobacteriaceae    | Synechocystis        | 1   |
|                |                     |                        | Methanosphaera       | 1   |
| Firmicutes     | Bacillales          | Bacillaceae            | Bacillus             | 120 |
|                |                     | Listeriaceae           | Oceanobacillus       | 2   |
|                |                     | Staphylococcaceae      | Listeria             | 11  |
|                | Lactobacillales     | Unassigned             | Macrococcus          | 1   |
|                |                     | Enterococcaceae        | Staphylococcus       | 49  |
|                |                     | Lactobacillaceae       | Exiguobacterium      | 2   |
|                |                     | Streptococcaceae       | Enterococcus         | 40  |
|                | Clostridiales       |                        | Lactobacillus        | 39  |
|                |                     |                        | Streptococcus        | 4   |
|                |                     |                        | Clostridium          | 23  |
|                |                     | Hungateella            | 1                    |     |
|                |                     | Eubacteriaceae         | Anaerofustis         | 1   |
|                |                     |                        | Eubacterium          | 6   |
|                |                     |                        | Anaerostipes         | 1   |
|                |                     |                        | Blautia              | 5   |
|                |                     |                        | Butyrivibrio         | 2   |
|                |                     |                        | Cellulosilyticum     | 1   |
|                |                     | Coprococcus            | 2                    |     |
| Clostridiales  | Lachnospiraceae     | Dorea                  | 1                    |     |
|                |                     | Lachnoclostridium      | 4                    |     |
|                |                     | Marvinbryantia         | 2                    |     |
|                |                     | Oribacterium           | 1                    |     |
|                |                     | Roseburia              | 4                    |     |
|                |                     | Tyzzerella             | 2                    |     |
|                |                     | Unassigned             | 1                    |     |
|                |                     | Peptococcaceae         | Desulfotobacterium   | 1   |
|                |                     | Peptostreptococcaceae  | Intestinibacter      | 1   |
|                |                     |                        | Peptoclostridium     | 12  |
|                |                     | Anaerotruncus          | 1                    |     |
|                | Ruminococcaceae     | Faecalibacterium       | 1                    |     |
|                |                     | Ruminiclostridium      | 1                    |     |
|                |                     | Ruminococcus           | 1                    |     |
|                |                     | Unassigned             | 3                    |     |
|                |                     | Catenibacterium        | 1                    |     |
|                |                     | Coprobacillus          | 1                    |     |
|                |                     | Erysipelatoclostridium | 1                    |     |
|                |                     | Holdemanella           | 1                    |     |
|                |                     | Turricibacter          | 1                    |     |
|                |                     | Unassigned             | 1                    |     |
| Fusobacteria   | Tissierellales      | Peptoniphiliaceae      | Peptoniphilus        | 1   |
|                | Fusobacteriales     | Fusobacteriaceae       | Fusobacterium        | 5   |
| Planctomycetes | Planctomycetales    | Planctomycetaceae      | Blastopirellula      | 2   |
|                |                     |                        | Gemmata              | 1   |
| Proteobacteria | Acidithiobacillales | Acidithiobacillaceae   | Gimesia              | 1   |
|                |                     | Beijerinckiaceae       | Pirellula            | 1   |
|                |                     | Bradyrhizobiaceae      | Planctopirius        | 1   |
|                | Rhizobiales         |                        | Rhodopirellula       | 1   |
|                |                     |                        | Acidithiobacillus    | 1   |
|                |                     |                        | Beijerinckia         | 1   |
|                |                     |                        | Nitrobacter          | 2   |
|                |                     |                        | Oligotropha          | 1   |
|                |                     |                        | Rhodospseudomonas    | 5   |
|                |                     |                        | Hypomicrobium        | 1   |
|                |                     | Rhodomicrobium         | 1                    |     |
|                |                     | Methylobacterium       | 3                    |     |
|                |                     | Mesorhizobium          | 1                    |     |
|                |                     | Agrobacterium          | 1                    |     |
|                |                     | Rhizobium              | 1                    |     |
|                |                     | Azorhizobium           | 1                    |     |
|                |                     | Starkeya               | 1                    |     |
|                |                     | Xanthobacteraceae      | Xanthobacter         | 1   |
|                |                     |                        | Labrenzia            | 1   |
|                |                     |                        | Roseobacter          | 1   |
|                |                     | Acetobacteraceae       | Glucanacetobacter    | 1   |
|                |                     | Rickettsiaceae         | Rickettsia           | 1   |
|                |                     | Alcaligenaceae         | Bordetella           | 4   |
|                |                     | Burkholderiaceae       | Burkholderia         | 3   |
|                |                     |                        | Polynucleobacter     | 1   |
|                | Burkholderiales     | Comamonadaceae         | Comamonas            | 2   |
|                |                     |                        | Delftia              | 1   |
|                |                     | Oxalobacteraceae       | Oxalobacter          | 2   |
|                |                     | Bdellovibrionaceae     | Bdellovibrio         | 1   |
|                |                     | Desulfotubificaceae    | Desulfotalea         | 2   |
|                |                     | Desulfovibrionaceae    | Desulfovibrio        | 1   |
|                |                     | Aeromonadaceae         | Aeromonas            | 1   |
|                |                     | Shewanellaceae         | Shewanella           | 2   |
|                |                     | Halothiobacillaceae    | Halothiobacillus     | 1   |
|                |                     |                        | Escherichia          | 1   |
|                |                     |                        | Pectobacterium       | 3   |
|                | Enterobacteriales   | Enterobacteriaceae     | Proteus              | 2   |
|                |                     |                        | Providencia          | 4   |
|                |                     |                        | Yersinia             | 5   |
|                | Legionellales       | Legionellaceae         | Legionella           | 1   |
|                | Pseudomonadales     | Moraxellaceae          | Acinetobacter        | 4   |
|                |                     | Pseudomonadaceae       | Pseudomonas          | 2   |
|                |                     |                        | Allivibrio           | 1   |
|                |                     | Vibrionaceae           | Photobacterium       | 3   |
|                |                     |                        | Vibrio               | 14  |
|                | Xanthomonadales     | Xanthomonadaceae       | Stenotrophomonas     | 2   |
|                | Brachyspirales      | Brachyspiraceae        | Brachyspira          | 3   |
|                | Spirochaetales      | Spirochaetaceae        | Treponema            | 1   |
|                | Synergistales       | Synergistaceae         | Dethiosulfobrevibrio | 1   |
|                |                     |                        | Pyramidobacter       | 1   |
|                | Verrucomicrobia     | Verrucomicrobiaceae    | Verrucomicrobium     | 1   |
|                | Euryarchaeota       | Natrialbaeae           | Haloterrigena        | 1   |

**Figure S6 Taxonomic identification of BSHs in HMP database.** The numbers in last column indicate the number of BSHs in each genus.

| Phylum                | Class                             | Order                             | Family                    | Genus                    | Number of paralogs |      |      |
|-----------------------|-----------------------------------|-----------------------------------|---------------------------|--------------------------|--------------------|------|------|
|                       |                                   |                                   |                           |                          | NP=2               | NP=3 | NP=4 |
| <i>Actinobacteria</i> | <i>Actinobacteria</i>             | <i>Bifidobacteriales</i>          | <i>Bifidobacteriaceae</i> | <i>Bifidobacterium</i>   | 1                  | -    | -    |
| <i>Bacteroidetes</i>  | <i>Bacteroidia</i>                | <i>Bacteroidales</i>              | <i>Bacteroidaceae</i>     | <i>Bacteroides</i>       | 15                 | 9    | 3    |
|                       |                                   |                                   | <i>Porphyromonadaceae</i> | <i>Parabacteroides</i>   | 4                  | -    | -    |
| <i>Firmicutes</i>     | <i>Bacilli</i>                    | <i>Bacillales</i>                 | <i>Bacillaceae</i>        | <i>Bacillus</i>          | 41                 | 5    | -    |
|                       |                                   |                                   |                           | <i>Oceanobacillus</i>    | 1                  | -    | -    |
|                       |                                   |                                   | <i>Staphylococcaceae</i>  | <i>Staphylococcus</i>    | 6                  | -    | -    |
|                       |                                   | <i>Lactobacillales</i>            | <i>Enterococcaceae</i>    | <i>Enterococcus</i>      | 13                 | -    | -    |
|                       |                                   |                                   | <i>Lactobacillaceae</i>   | <i>Lactobacillus</i>     | 6                  | -    | -    |
|                       |                                   |                                   | <i>Clostridiaceae</i>     | <i>Clostridium</i>       | 5                  | -    | -    |
|                       | <i>Clostridia</i>                 | <i>Clostridiales</i>              | <i>Eubacteriaceae</i>     | <i>Eubacterium</i>       | 3                  | -    | -    |
|                       |                                   |                                   |                           | <i>Blautia</i>           | 2                  | -    | -    |
|                       |                                   |                                   |                           | <i>Butyrivibrio</i>      | 1                  | -    | -    |
|                       |                                   |                                   | <i>Lachnospiraceae</i>    | <i>Lachnoclostridium</i> | 1                  | -    | -    |
|                       |                                   |                                   |                           | <i>Marvinbryantia</i>    | 1                  | -    | -    |
|                       |                                   |                                   |                           | <i>Roseburia</i>         | -                  | 1    | -    |
|                       |                                   |                                   |                           | <i>Tyzzerella</i>        | 1                  | -    | -    |
|                       | <i>Unclassified Clostridiales</i> | <i>Unclassified Clostridiales</i> | 1                         | -                        | -                  |      |      |
| <i>Planctomycetes</i> | <i>Planctomycetia</i>             | <i>Planctomycetales</i>           | <i>Planctomycetaceae</i>  | <i>Blastopirellula</i>   | 1                  | -    | -    |
| <i>Proteobacteria</i> | <i>Gammaproteobacteria</i>        | <i>Vibrionales</i>                | <i>Vibrionaceae</i>       | <i>Photobacterium</i>    | 1                  | -    | -    |
|                       | <i>Deltaproteobacteria</i>        | <i>Desulfobacteriales</i>         | <i>Desulfobulbaceae</i>   | <i>Desulfotalea</i>      | 1                  | -    | -    |

**Figure S7 The Taxonomic identification and paralogs distribution of BSHs in HMP.**

The numbers in last three columns indicate the number of strains containing BSH paralogs.

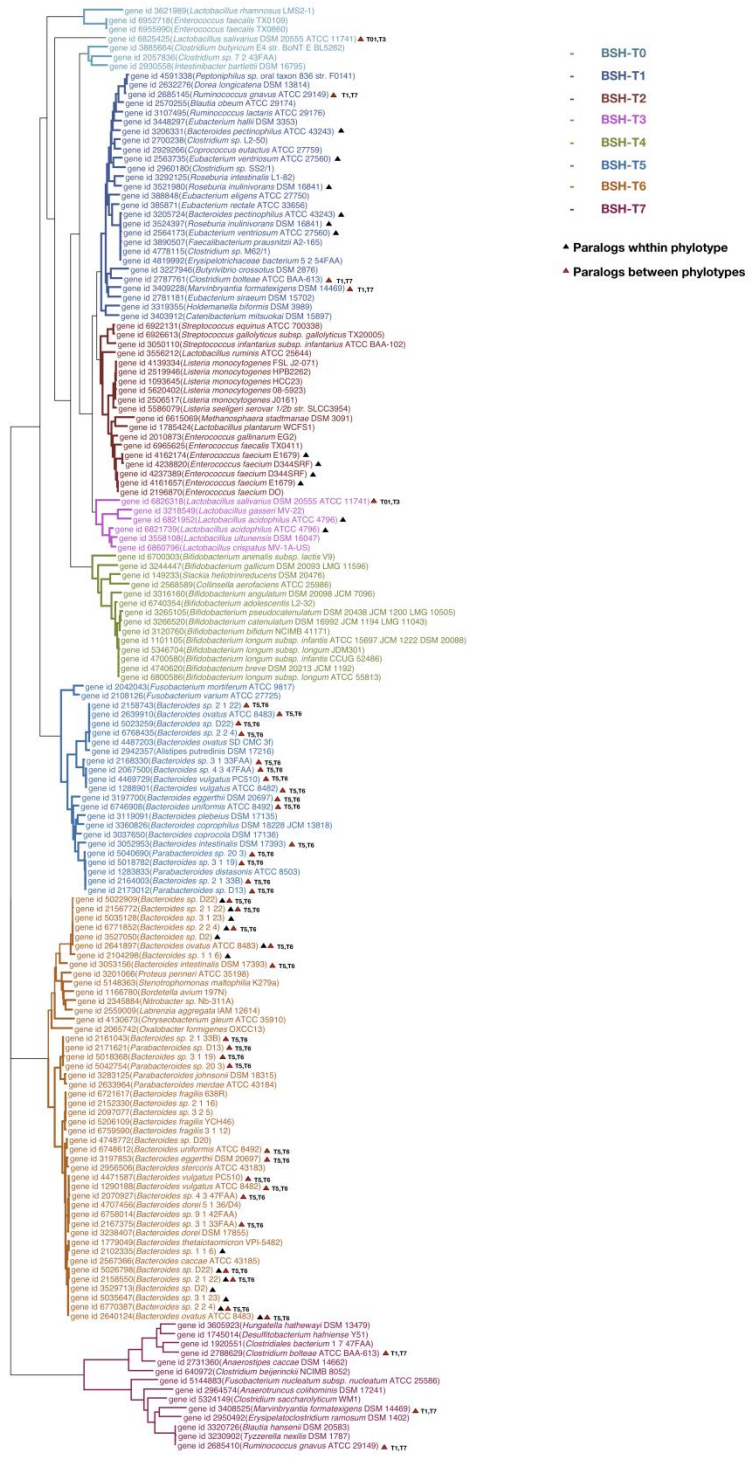

**Figure S8 Phylogenetic tree of BSHs in the gut micorbioime of 11 populations.** The id and strain name of BSHs are provided. Different color represents different phylotype of reclassified BSHs, from top to bottom are BSH-T0, BSH-T1, BSH-T2, BSH-T3, BSH-T4, BSH-T5, BSH-T6 and BSH- T7, respectively. Triangles indicate the strains with paralogs.



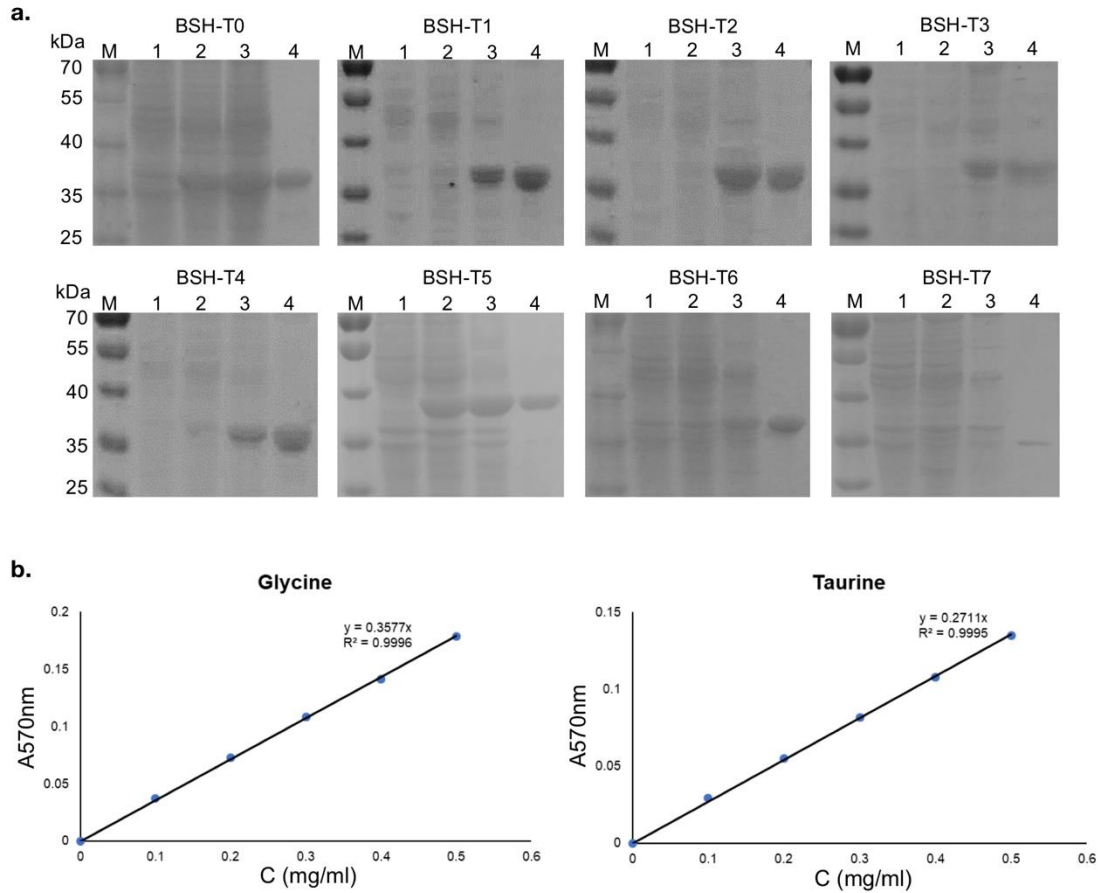

**Figure S9 SDS-PAGE of BSH and Standard curve used in ninhydrin assay. a** SDS-PAGE of BSH protein. M: Marker; Lane 1: *E.coli* BL21(DE3); Lane 2: *E.coli* BL21(DE3)-*bsh* (-IPTG), Lane 3: *E.coli* BL21(DE3)-*bsh* (+IPTG), Lane 4: Purified BSH. **b** Standard curve of glycine and taurine.

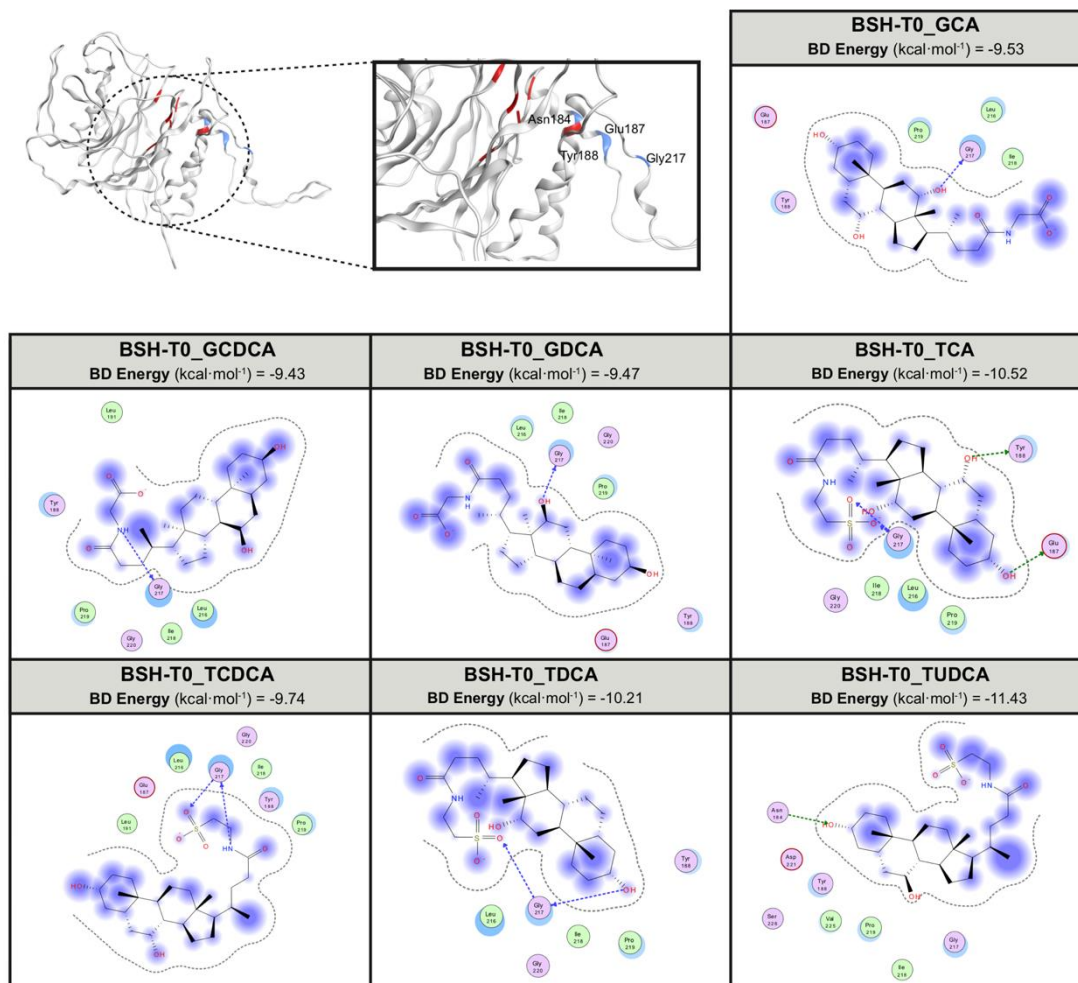

|                                         | GCA    | GCDCA  | GDCA   | TCA                        | TCDCA  | TDCA   | TUDCA  |
|-----------------------------------------|--------|--------|--------|----------------------------|--------|--------|--------|
| <b>Residue contacts :<br/>to ligand</b> | Gly217 | Gly217 | Gly217 | Glu187<br>Tyr188<br>Gly217 | Gly217 | Gly217 | Asn184 |

**Figure S10 Molecular docking results between BSH-T0 and bile acids.** The predicted binding models of BSH-T0 with GCA, GCDCA, GDCA, TCA, TCDCA, TDCA and TUDCA. The residues contact to ligand showed in the below table.

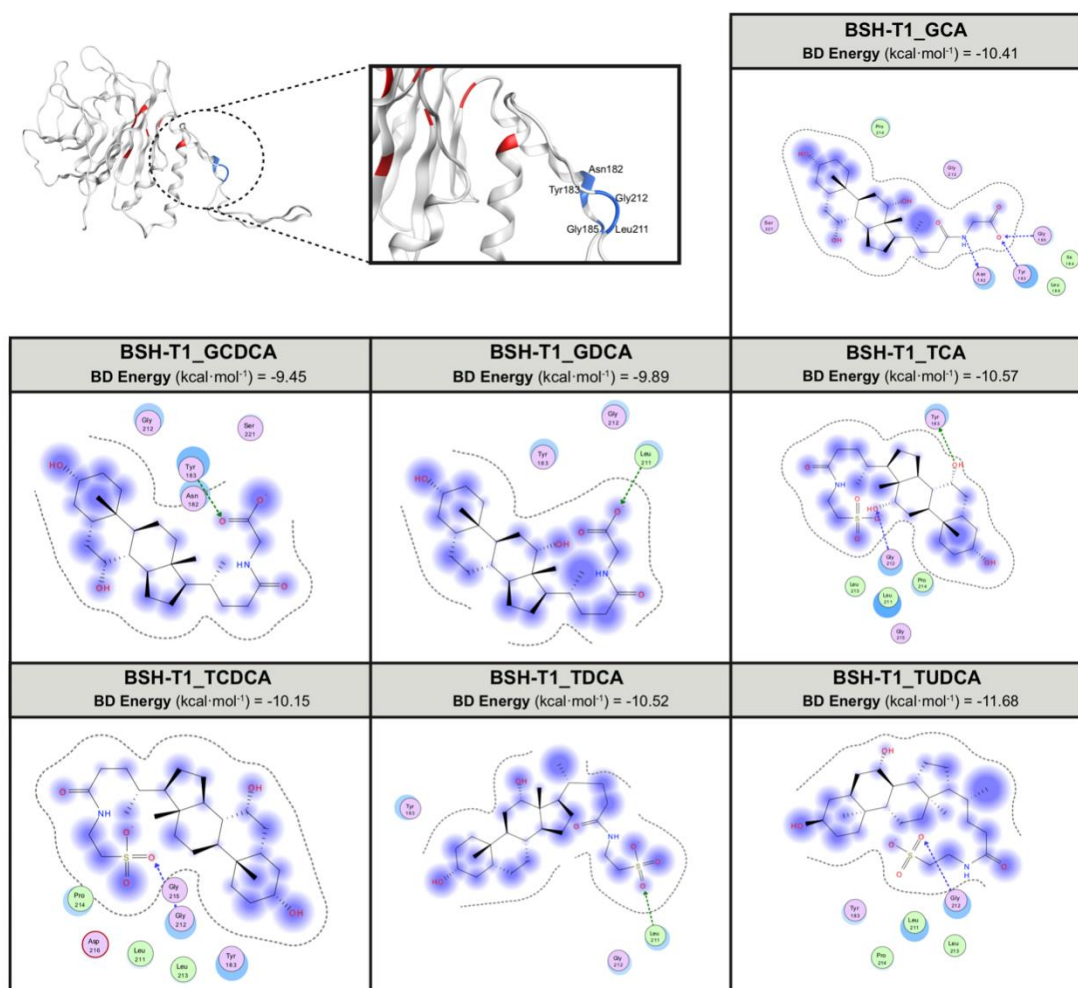

|                                         | GCA                        | GCDCA  | GDCA   | TCA              | TCDCA  | TDCA   | TUDCA  |
|-----------------------------------------|----------------------------|--------|--------|------------------|--------|--------|--------|
| <b>Residue contacts :<br/>to ligand</b> | Asn182<br>Tyr183<br>Gly185 | Tyr183 | Leu211 | Tyr183<br>Gly212 | Gly212 | Leu211 | Gly212 |

**Figure S11 Molecular docking studies between BSH-T1 and bile acids.** The predicted binding models of BSH-T1 with GCA, GCDCA, GDCA, TCA, TCDCA, TDCA and TUDCA. The residues contact to ligand showed in the below table.

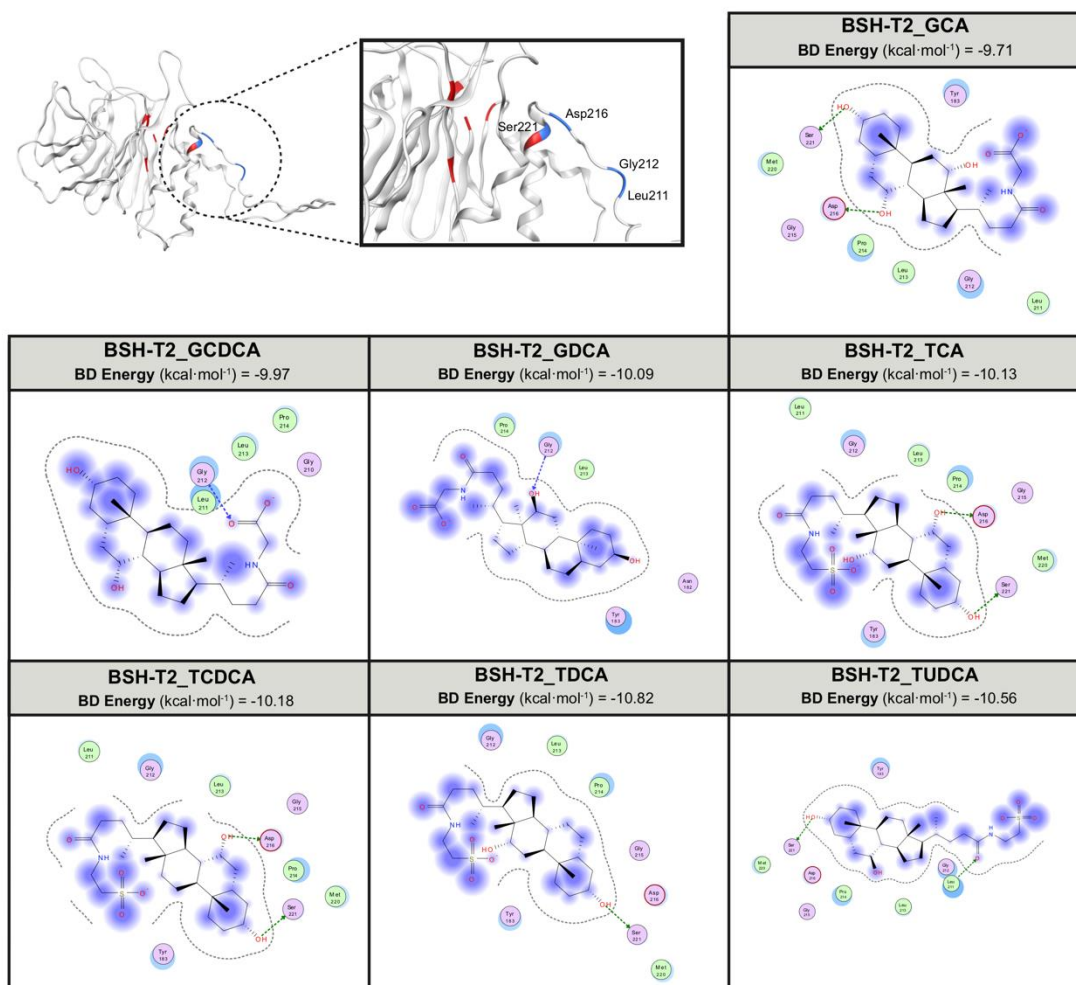

|                                         | GCA              | GCDCA  | GDCA   | TCA              | TCDCA            | TDCA   | TUDCA            |
|-----------------------------------------|------------------|--------|--------|------------------|------------------|--------|------------------|
| <b>Residue contacts :<br/>to ligand</b> | Asp216<br>Ser221 | Gly212 | Gly212 | Asp216<br>Ser221 | Asp216<br>Ser221 | Ser221 | Leu211<br>Ser221 |

**Figure S12 Molecular docking studies between BSH-T2 and bile acids.** The predicted binding models of BSH-T2 with GCA, GCDCA, GDCA, TCA, TCDCA, TDCA and TUDCA. The residues contact to ligand showed in the below table.

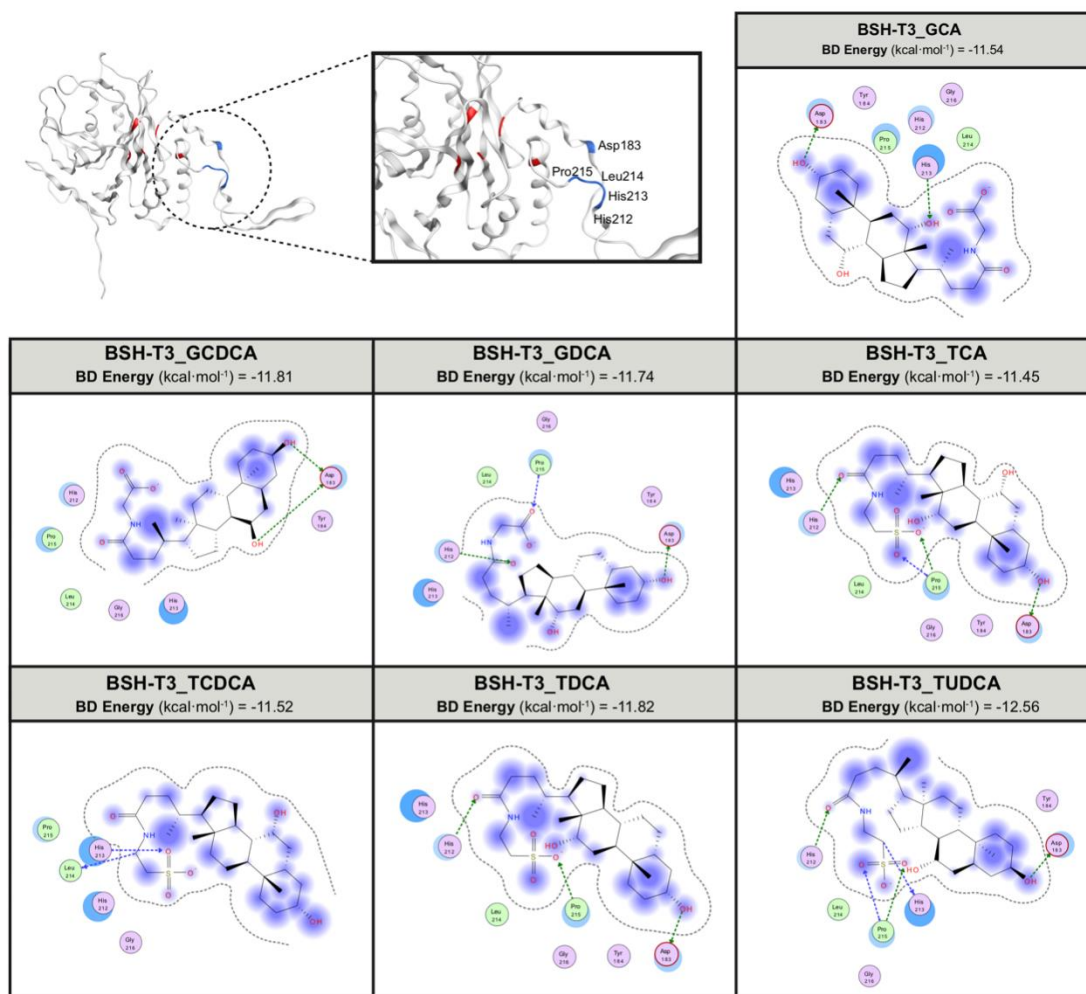

|                                         | GCA              | GCDCA  | GDCA                       | TCA                        | TCDCA            | TDCA                       | TUDCA                      |
|-----------------------------------------|------------------|--------|----------------------------|----------------------------|------------------|----------------------------|----------------------------|
| <b>Residue contacts :<br/>to ligand</b> | Asp183<br>His213 | Asp183 | Asp183<br>His212<br>Pro215 | Asp183<br>His212<br>Pro215 | His213<br>Leu214 | Asp183<br>His212<br>Pro215 | Asp183<br>His213<br>Pro215 |

**Figure S13 Molecular docking studies between BSH-T3 and bile acids.** The predicted binding models of BSH-T3 with GCA, GCDCA, GDCA, TCA, TCDCA, TDCA and TUDCA. The residues contact to ligand showed in the below table.

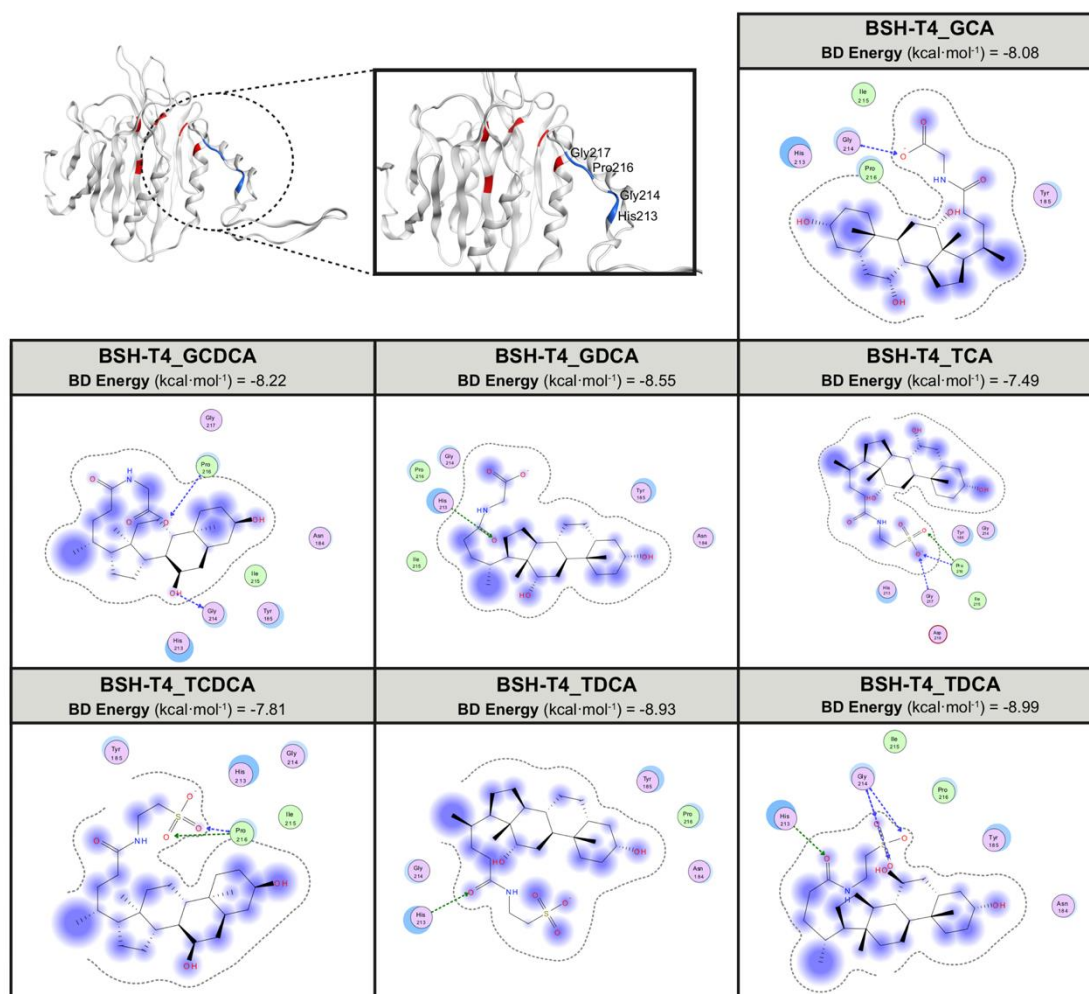

|                                         | GCA    | GCDCA            | GDCA   | TCA              | TCDCA  | TDCA   | TUDCA            |
|-----------------------------------------|--------|------------------|--------|------------------|--------|--------|------------------|
| <b>Residue contacts :<br/>to ligand</b> | Gly214 | Gly214<br>Pro216 | His213 | Pro216<br>Gly217 | Pro216 | His213 | His213<br>Gly214 |

**Figure S14 Molecular docking studies between BSH-T4 and bile acids.** The predicted binding models of BSH-T4 with GCA, GCDCA, GDCA, TCA, TCDCA, TDCA and TUDCA. The residues contact to ligand showed in the below table.

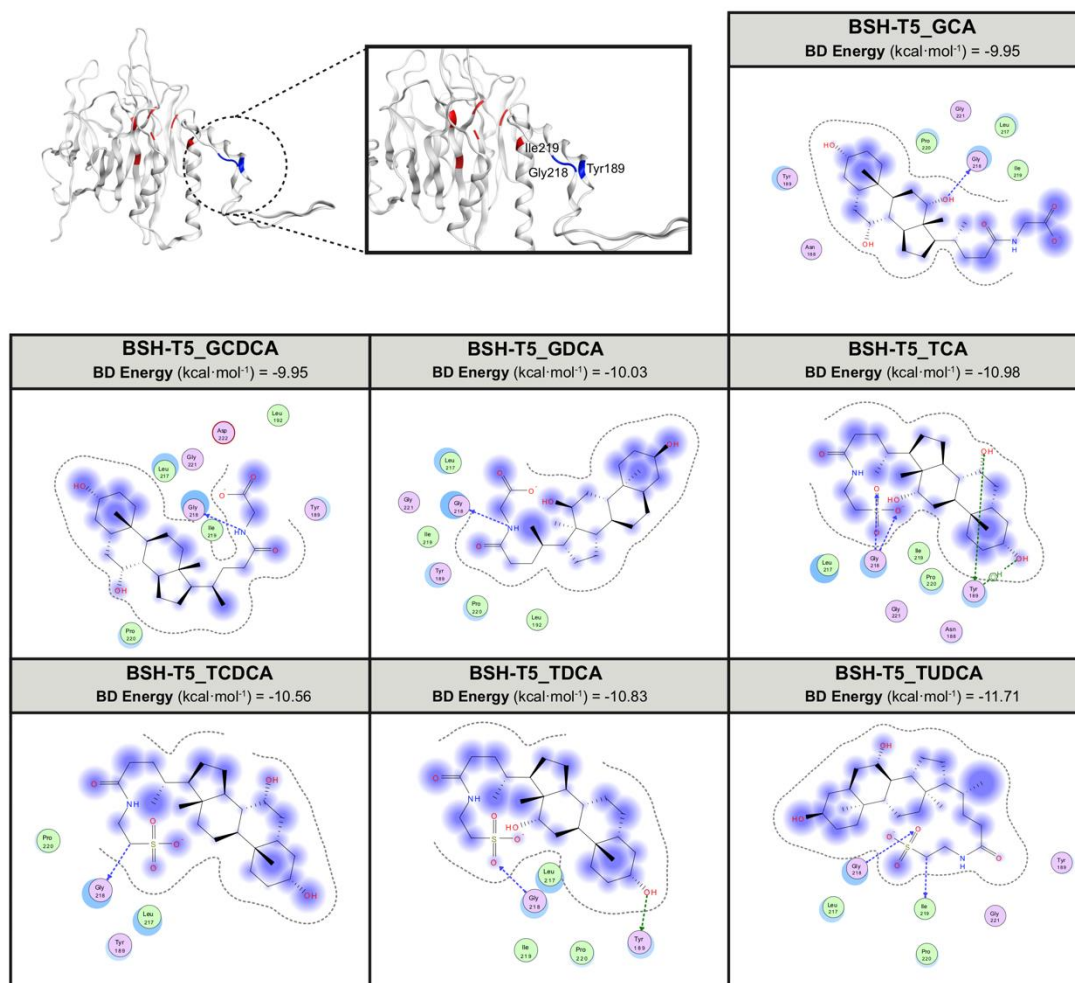

|                                         | GCA    | GCDCA  | GDCA   | TCA              | TCDCA  | TDCA             | TUDCA            |
|-----------------------------------------|--------|--------|--------|------------------|--------|------------------|------------------|
| <b>Residue contacts :<br/>to ligand</b> | Gly218 | Gly218 | Gly218 | Tyr189<br>Gly218 | Gly218 | Tyr189<br>Gly218 | Gly218<br>Ile219 |

**Figure S15 Molecular docking studies between BSH-T5 and bile acids.** The predicted binding models of BSH-T5 with GCA, GCDCA, GDCA, TCA, TCDCA, TDCA and TUDCA. The residues contact to ligand showed in the below table.

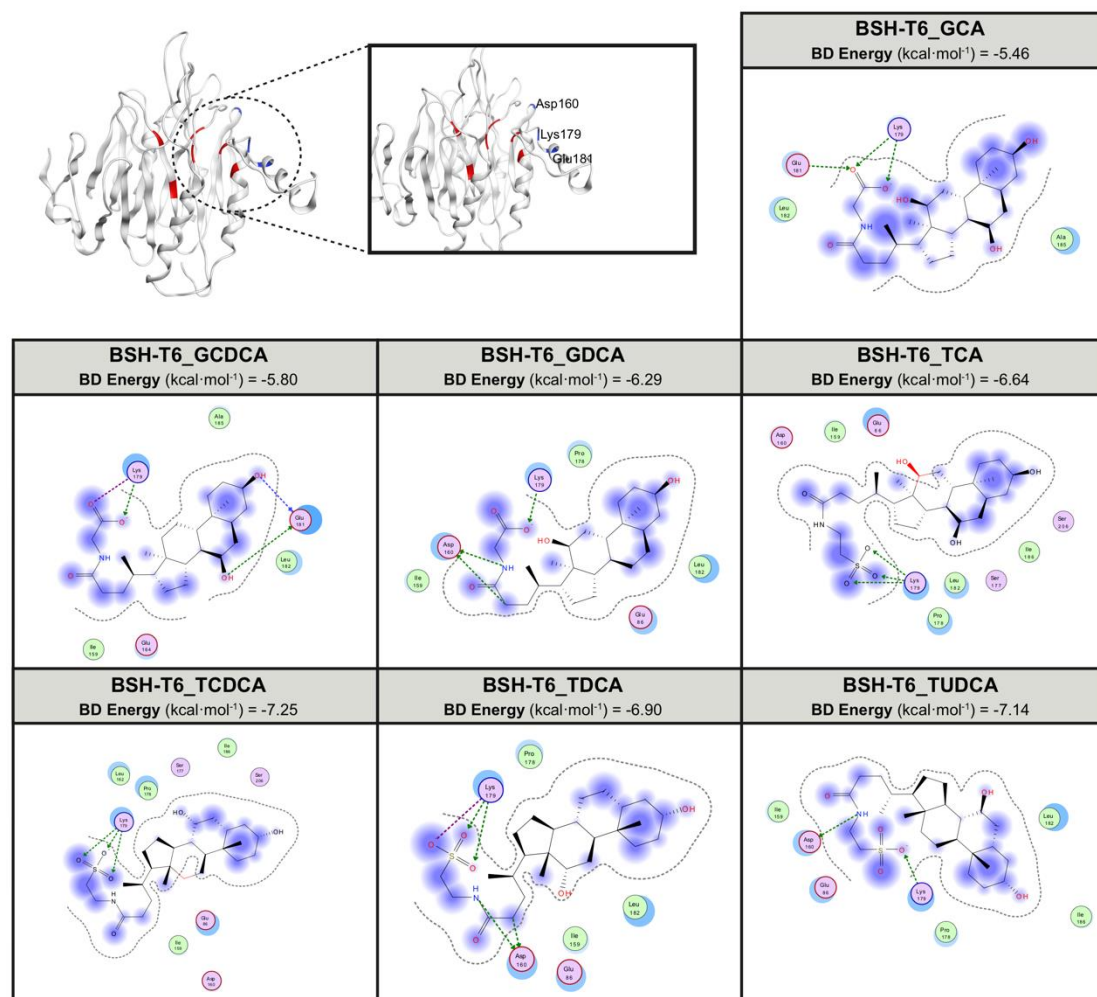

|                           | GCA    | GCDCA  | GDCA   | TCA    | TCDCA  | TDCA   | TUDCA  |
|---------------------------|--------|--------|--------|--------|--------|--------|--------|
| <b>Residue contacts :</b> | Lys179 | Lys179 | Asp160 | Lys179 | Lys179 | Asp160 | Asp160 |
| <b>to ligand</b>          | Glu181 | Glu181 | Lys179 |        |        | Lys179 | Lys179 |

**Figure S16 Molecular docking studies between BSH-T6 and bile acids.** The predicted binding models of BSH-T6 with GCA, GCDCA, GDCA, TCA, TCDCA, TDCA and TUDCA. The residues contact to ligand showed in the below table.



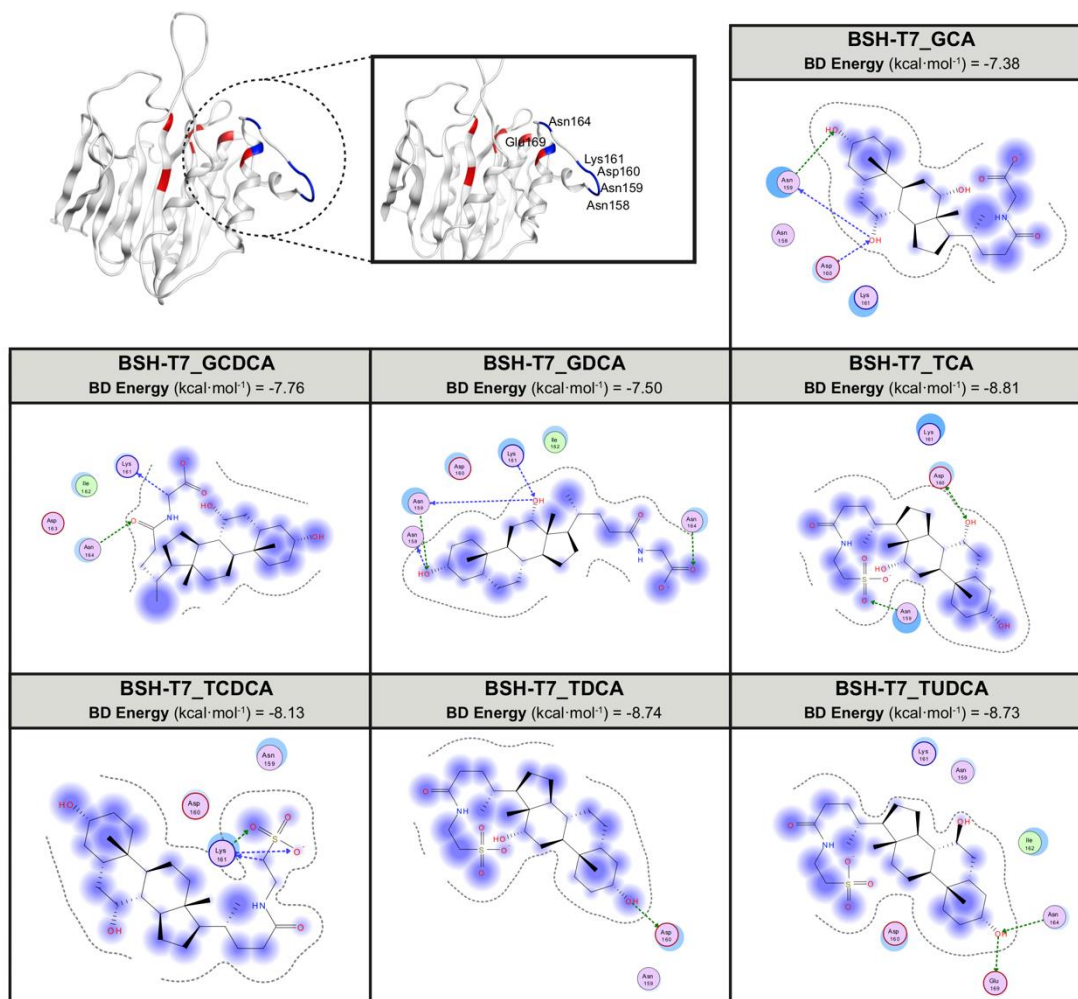

|                                         | GCA              | GCDCA            | GDCA                                 | TCA              | TCDCA  | TDCA   | TUDCA            |
|-----------------------------------------|------------------|------------------|--------------------------------------|------------------|--------|--------|------------------|
| <b>Residue contacts :<br/>to ligand</b> | Asn159<br>Asp160 | Lys161<br>Asn164 | Asn158<br>Asn159<br>Lys161<br>Asn164 | Asn159<br>Asp160 | Lys161 | Asp160 | Asn164<br>Glu169 |

**Figure S17 Molecular docking studies between BSH-T7 and bile acids.** The predicted binding models of BSH-T7 with GCA, GCDCA, GDCA, TCA, TCDCA, TDCA and TUDCA. The residues contact to ligand showed in the below table.

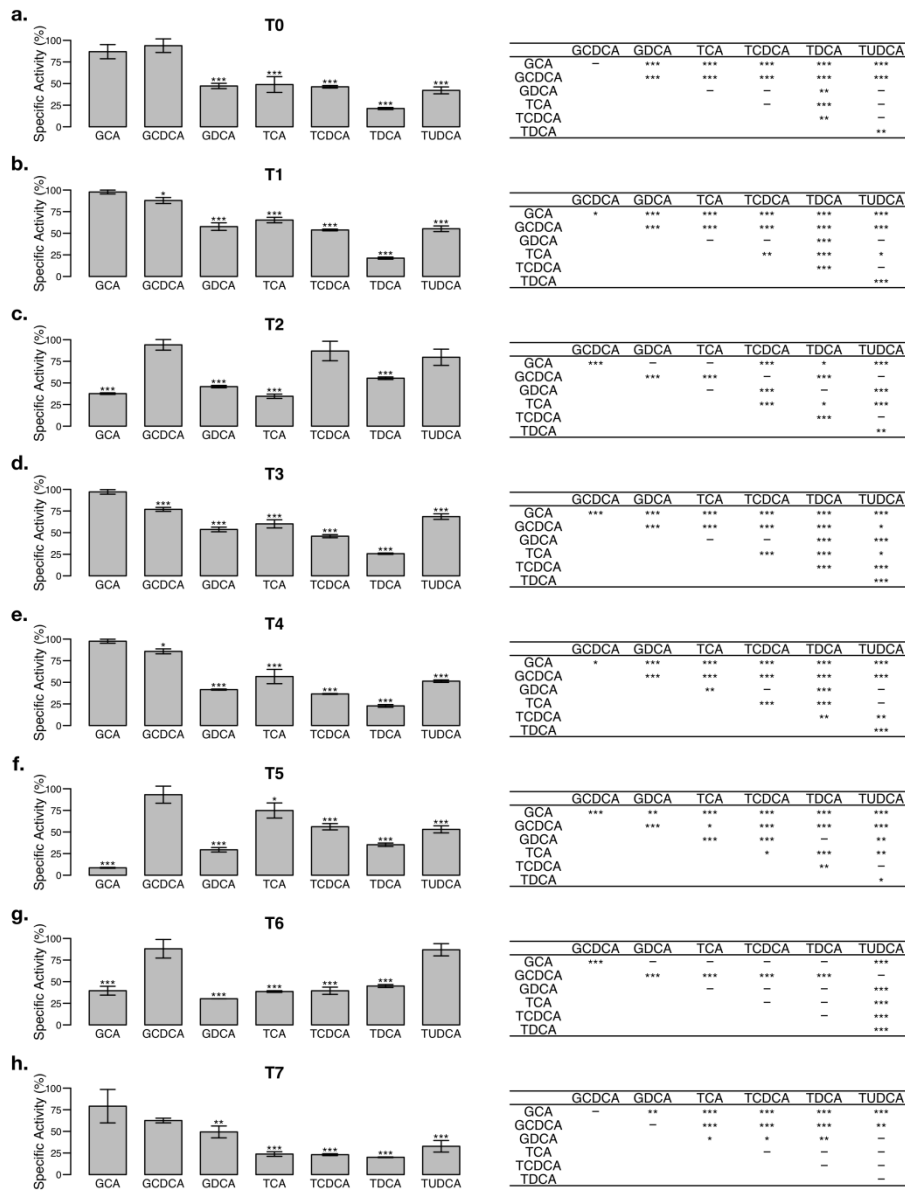

**Figure S18 Enzyme activity comparisons between substrates in each BSH phylotype.** The specific activity of an enzyme per milligram of total protein, using the highest enzyme activity as 100% for each BSH phylotype. **a** BSH-T0; **b** BSH-T1; **c** BSH-T2; **d** BSH-T3; **e** BSH-T4; **f** BSH-T5; **g** BSH-T6 and **h** BSH-T7. *p* value was analyzed by single-factor ANOVA with Tukey HSD test, \* *p* < 0.05, \*\* *p* < 0.01, \*\*\* *p* < 0.001, versus the substrate which shown highest enzyme activity in each BSH. Details shown in Table S8. GCA, Glycocholic acid; GCDCA, Glycochenodeoxycholic acid; GDCA, Glycine deoxycholic acid; TCA, Taurocholic acid; TCDCa, Taurochnodeoxycholic acid; TDCA, Taurodeoxycholic acid; TUDCA, Tauroursodeoxycholic acid.

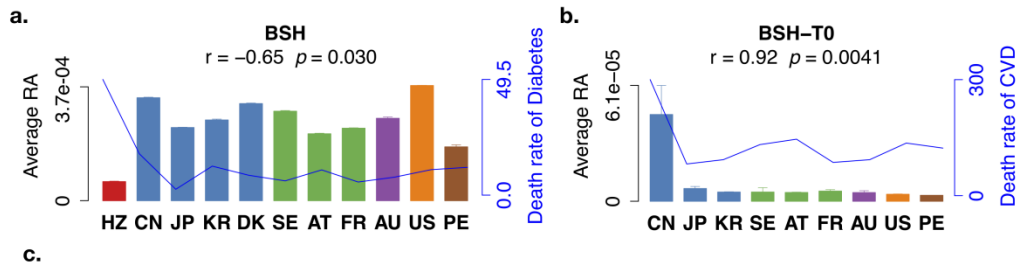

**c.**

|   | BSH | Population                                     | Correlation                |                            |                            |                           |
|---|-----|------------------------------------------------|----------------------------|----------------------------|----------------------------|---------------------------|
|   |     |                                                | Death rate of diabetes     | Death rate of CVD          | Mean blood cholesterol     | BMI of obesity            |
| 1 | All | HZ, CN, JP, KR<br>DK, SE, AT, FR<br>AU, US, PE | $r = -0.65$<br>$p = 0.030$ | $r = 0.00011$<br>$p = 1.0$ | $r = 0.50$<br>$p = 0.12$   | $r = 0.52$<br>$p = 0.10$  |
| 2 | T0  | CN, JP, KR, SE<br>AT, FR, AU, US<br>PE         | $r = 0.63$<br>$p = 0.25$   | $r = 0.92$<br>$p = 0.0041$ | $r = -0.62$<br>$p = 0.59$  | $r = -0.39$<br>$p = 0.48$ |
| 3 | T1  | HZ, CN, JP, KR<br>DK, SE, AT, FR<br>AU, US, PE | $r = -0.49$<br>$p = 0.25$  | $r = -0.21$<br>$p = 0.60$  | $r = 0.29$<br>$p = 0.62$   | $r = 0.15$<br>$p = 0.75$  |
| 4 | T2  | HZ, JP, KR, DK<br>SE, AT, FR, AU<br>US, PE     | $r = -0.33$<br>$p = 0.40$  | $r = -0.37$<br>$p = 0.46$  | $r = 0.26$<br>$p = 0.62$   | $r = -0.49$<br>$p = 0.41$ |
| 5 | T3  | CN, JP, AT, FR                                 | $r = 0.95$<br>$p = 0.25$   | $r = 0.84$<br>$p = 0.46$   | $r = -0.59$<br>$p = 0.62$  | $r = 0.21$<br>$p = 0.79$  |
| 6 | T4  | CN, JP, KR, DK<br>SE, AT, FR, AU<br>US, PE     | $r = -0.54$<br>$p = 0.25$  | $r = -0.34$<br>$p = 0.46$  | $r = 0.31$<br>$p = 0.62$   | $r = -0.49$<br>$p = 0.41$ |
| 7 | T5  | HZ, CN, JP, KR<br>DK, SE, AT, FR<br>AU, US, PE | $r = -0.38$<br>$p = 0.34$  | $r = 0.093$<br>$p = 0.79$  | $r = 0.18$<br>$p = 0.68$   | $r = 0.36$<br>$p = 0.48$  |
| 8 | T6  | CN, JP, KR, DK<br>SE, AT, FR, AU<br>US         | $r = 0.46$<br>$p = 0.33$   | $r = 0.42$<br>$p = 0.46$   | $r = -0.35$<br>$p = 0.62$  | $r = 0.29$<br>$p = 0.59$  |
| 9 | T7  | HZ, CN, JP, KR<br>DK, SE, AT, FR<br>AU, US, PE | $r = 0.086$<br>$p = 0.80$  | $r = 0.39$<br>$p = 0.46$   | $r = -0.035$<br>$p = 0.92$ | $r = -0.54$<br>$p = 0.41$ |

**Figure S19 Relationship between average RA of BSHs with WHO released phenotypes in 11 populations.** Correlation that shown significant difference between **a** average RA of BSH and death rate (per 100,000 individuals) of diabetes; **b** average RA of BSH-T0 and death rate (per 100,000 individuals) of cardiovascular diseases (CVD); **c** Correlation between different phylotypes of BSH abundance and death rate of diabetes and CVD, mean blood cholesterol and Body mass index (BMI) of obesity. R and p values were calculated form Pearson correlations to assess the relationship.

Here, the information of the WHO released phenotypes could be found in Table S10.  
RA, relative abundance.

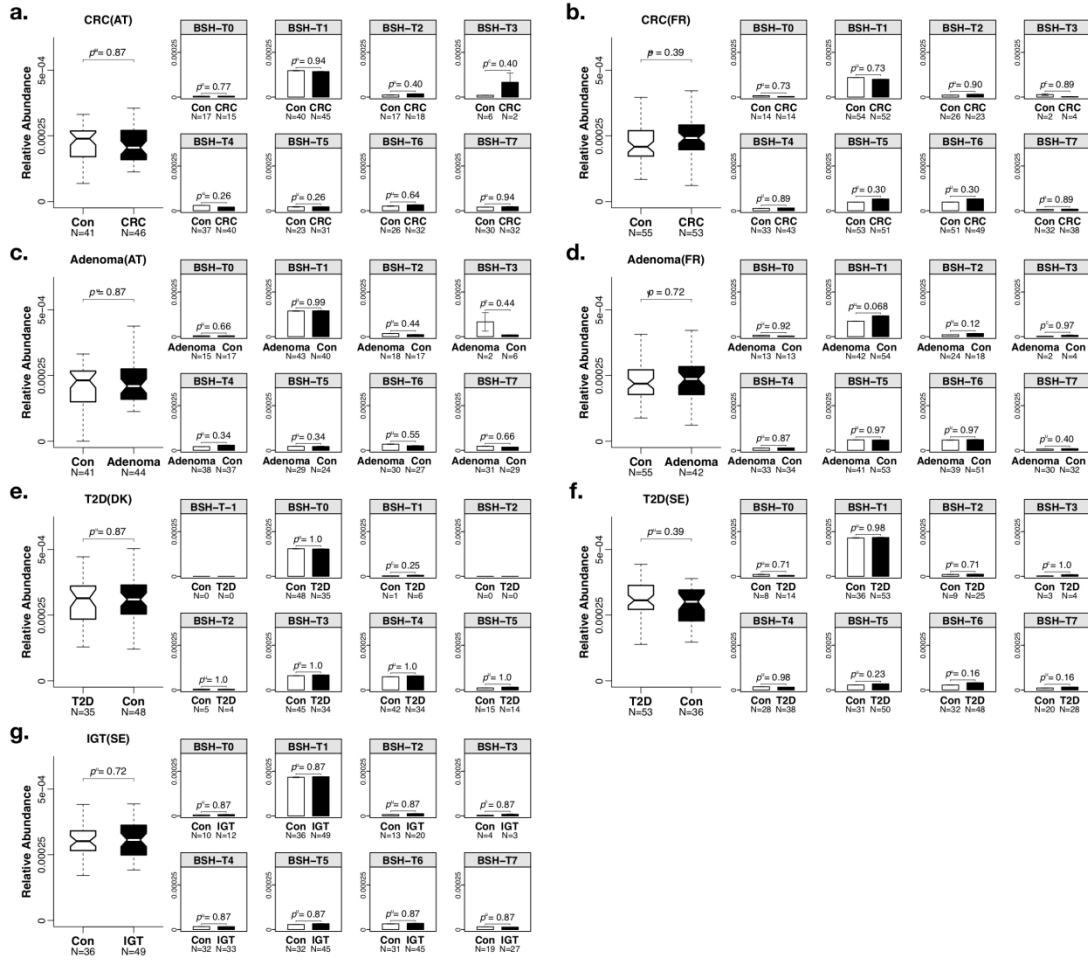

**Figure S20** The relative abundance of BSHs among case-control cohorts. **a** colorectal cancer (CRC) in Austria; **b** colorectal cancer (CRC) in Denmark; **c** Adenoma in Austria; **d** Adenoma in Denmark; **e** Type 2 diabetes (T2D) in Denmark; **f** Type 2 diabetes (T2D) in Sweden; **g** impaired glucose tolerance (IGT) in Sweden.  $p^c$  values were calculated by the Chi-squared test;  $p^u$  values were calculated by the Mann-Whitney U test,  $p$  values in each type were analyzed by followed by false discovery rate correction. The populations from CN and CN<sup>2</sup> are independent cases. Details are shown in Table S3.

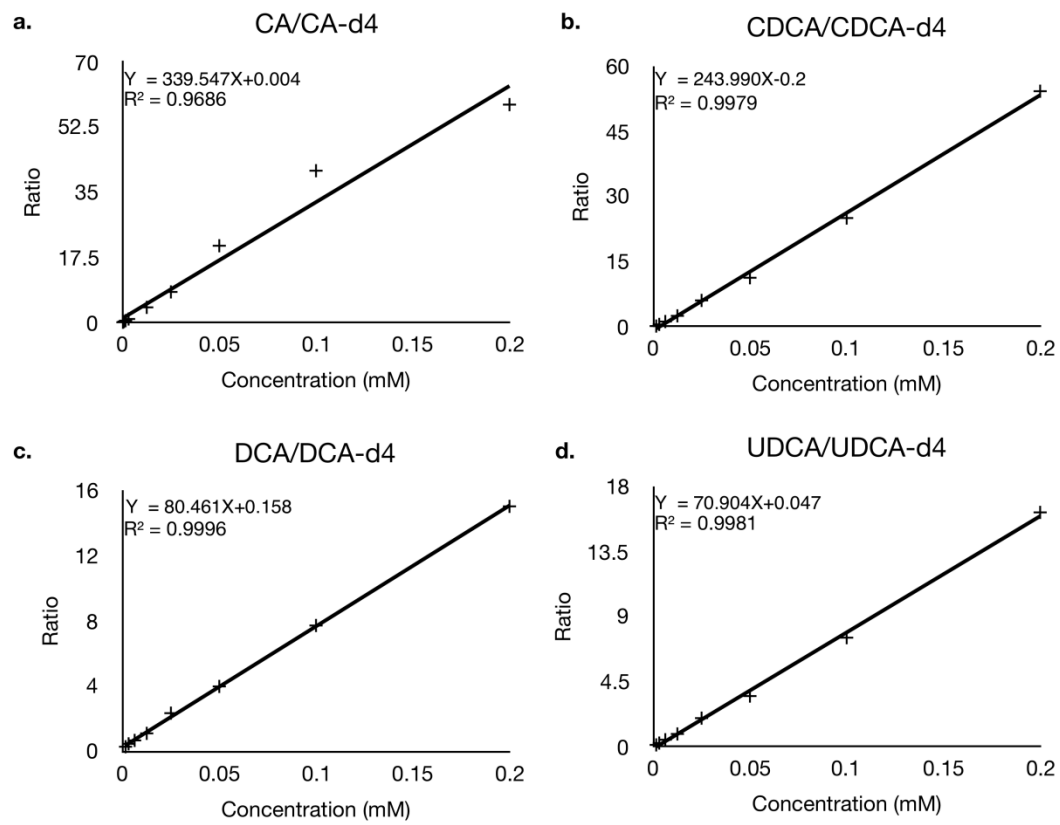

**Figure S21 Standard curve of bile acids used in LC-MS/MS. a CA; b CDCA; c DCA; d UDCA.**

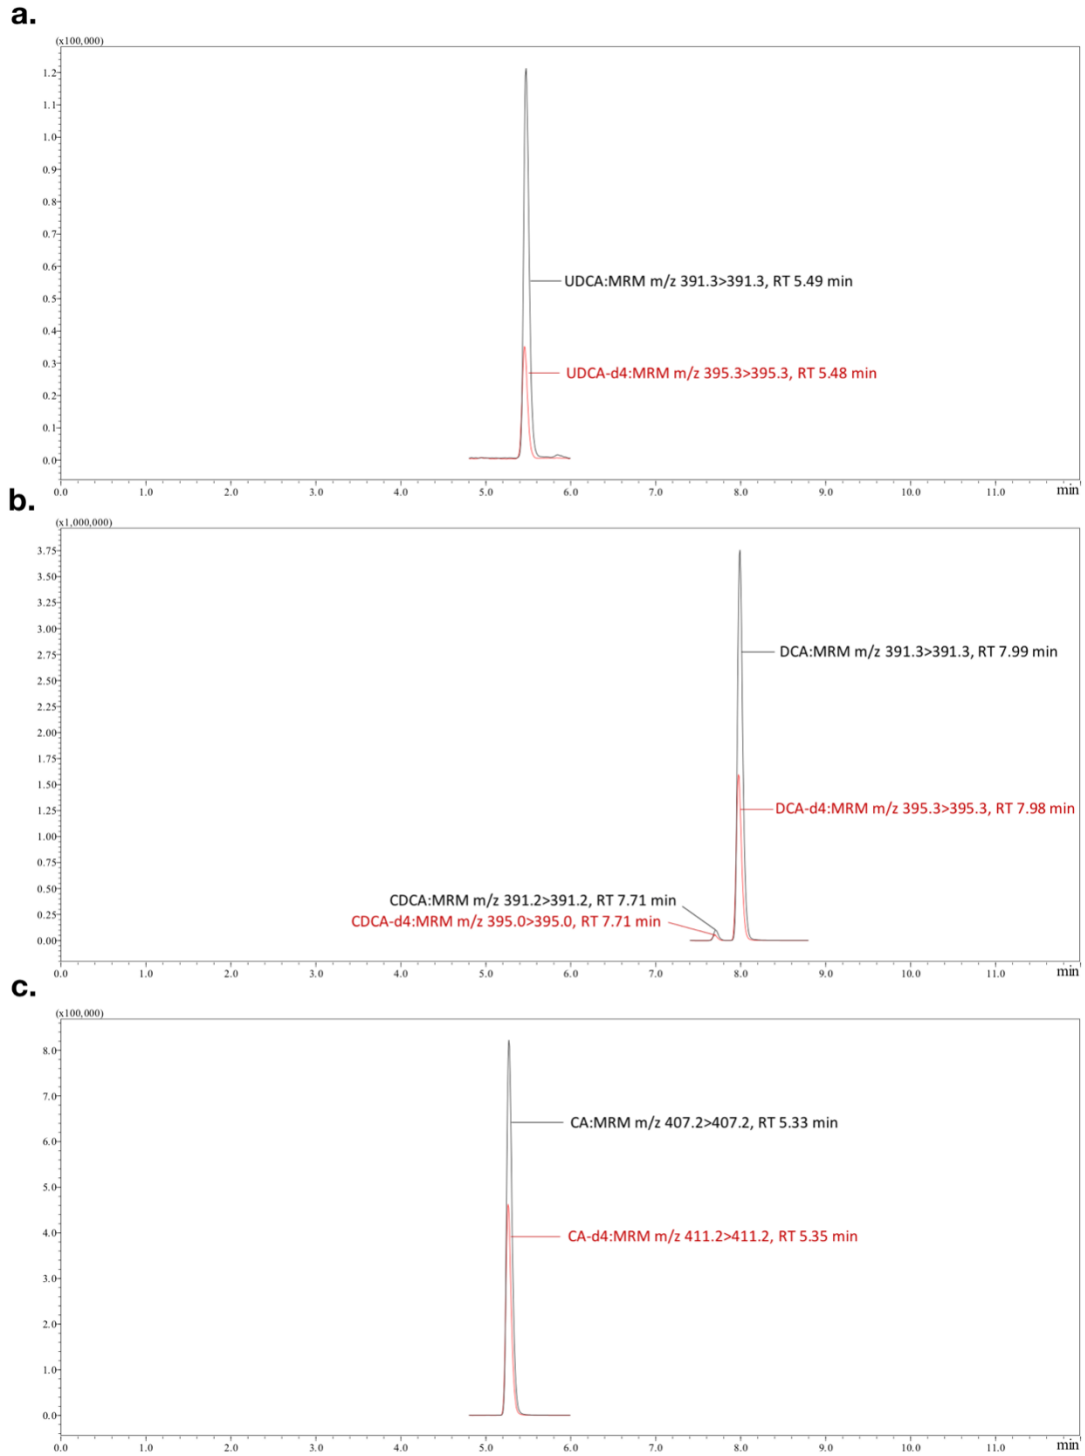

**Figure S22 Typical LC spectrum of different bile acids. a UDCA; b DCA and CDCA; c CA.**
